# Supplementary material for: Evolution of the Degenerated Y-Chromosome of the Swamp Guppy, Micropoecilia picta
Source: MDPI journal article supplement (doi:10.3390/cells11071118), 2022-03-25
Supplement: s1 [file s1]

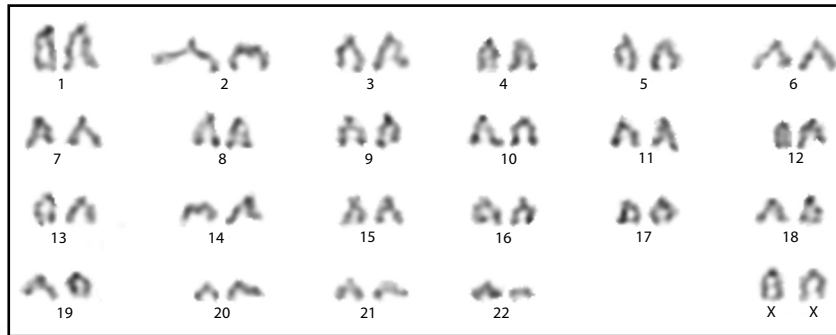

**Supplementary Figure S1:** C-banded karyotype of female *M. picta*

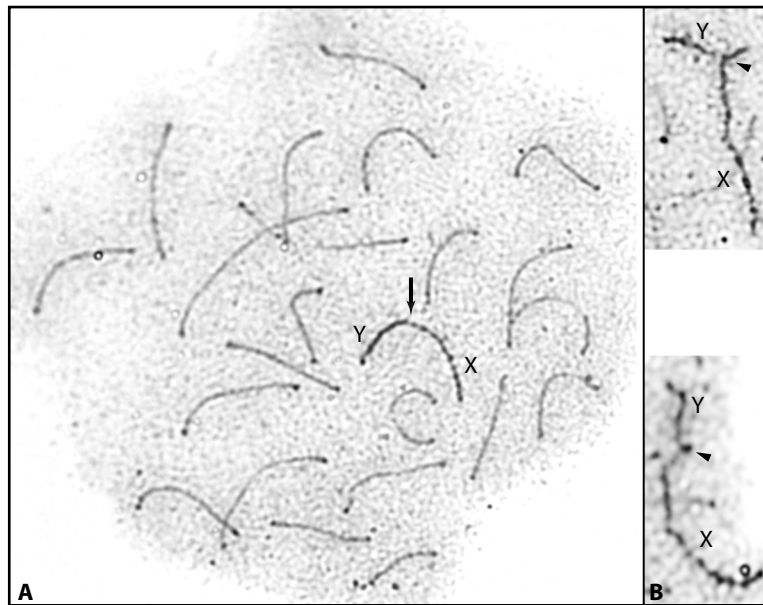

**Supplementary Figure S2.** Silver-stained meiotic prophase displaying autosomal SCs and the XY synapsis (**A**). Arrow indicates the full synapsis of Y with the X. (**B**) XY cutouts from pachytene showing partial paired associations (arrows).

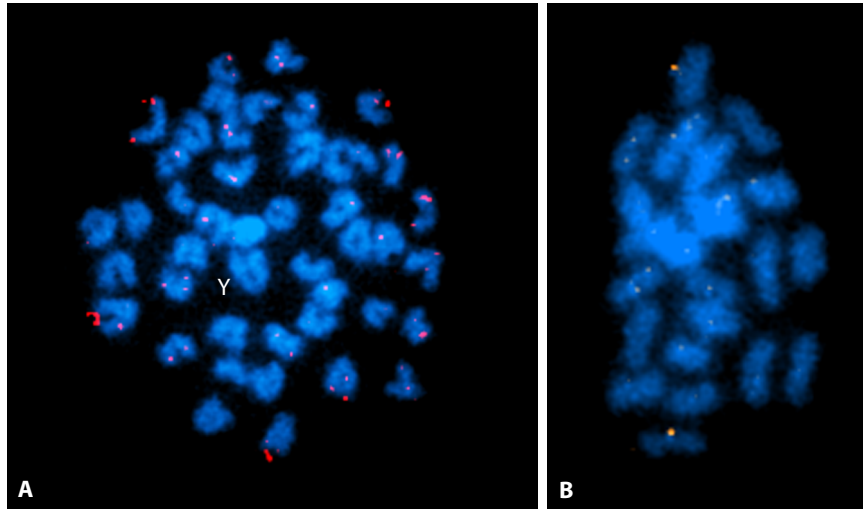

**Supplementary Figure S3:** Indirect immunofluorescence showing 5-methylcytosine rich regions in somatic metaphase (**A**) and metaphase I (**B**) of *P. wingei* (VE11). Note the absence of specific hypermethylated sites on the Y.

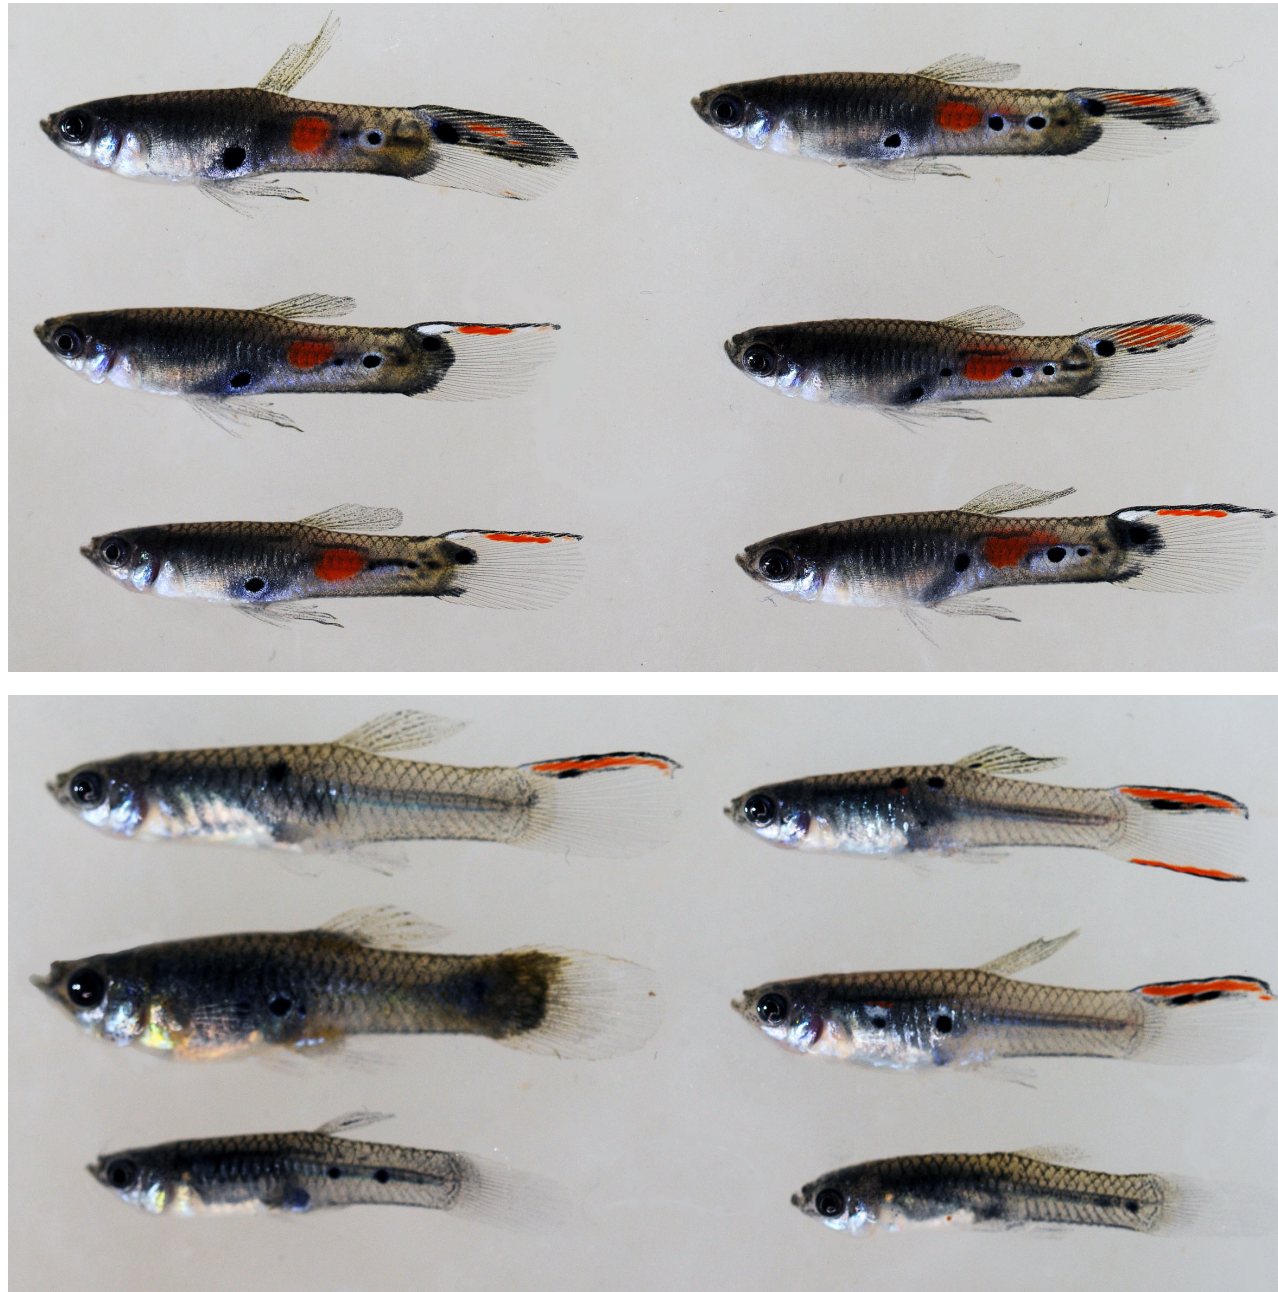

**Supplementary Figure S4:** Males (upper) and testosterone treated females (lower) of *P. reticulata*, strain RR.



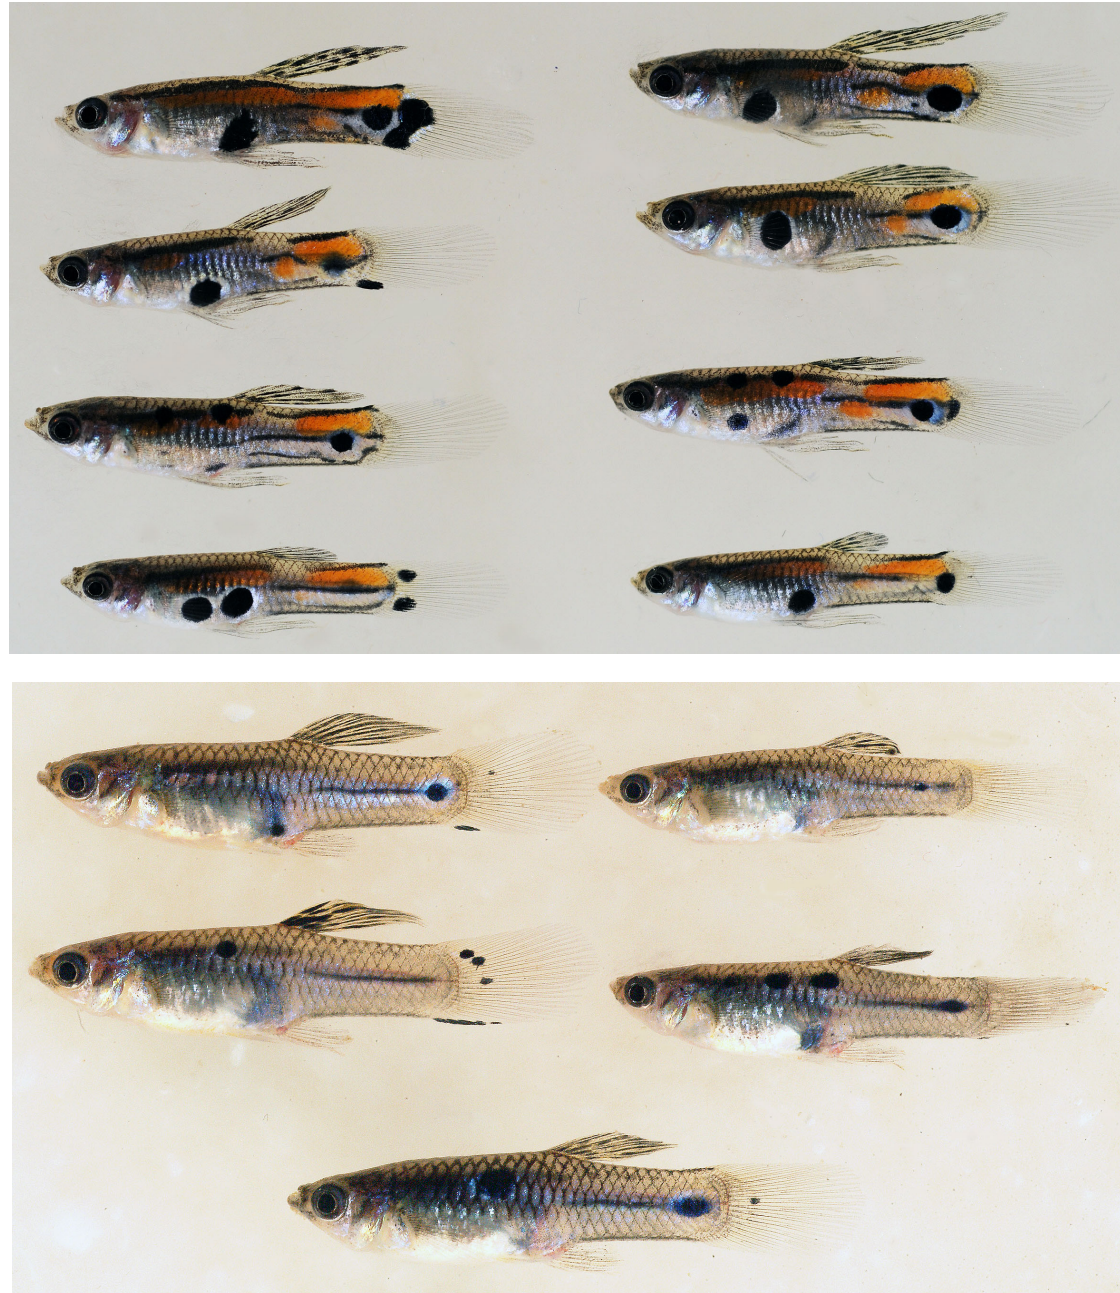

**Supplementary Figure S5:** Males (upper) and testosterone treated females (lower) of *P. reticulata*, strain „pauper“



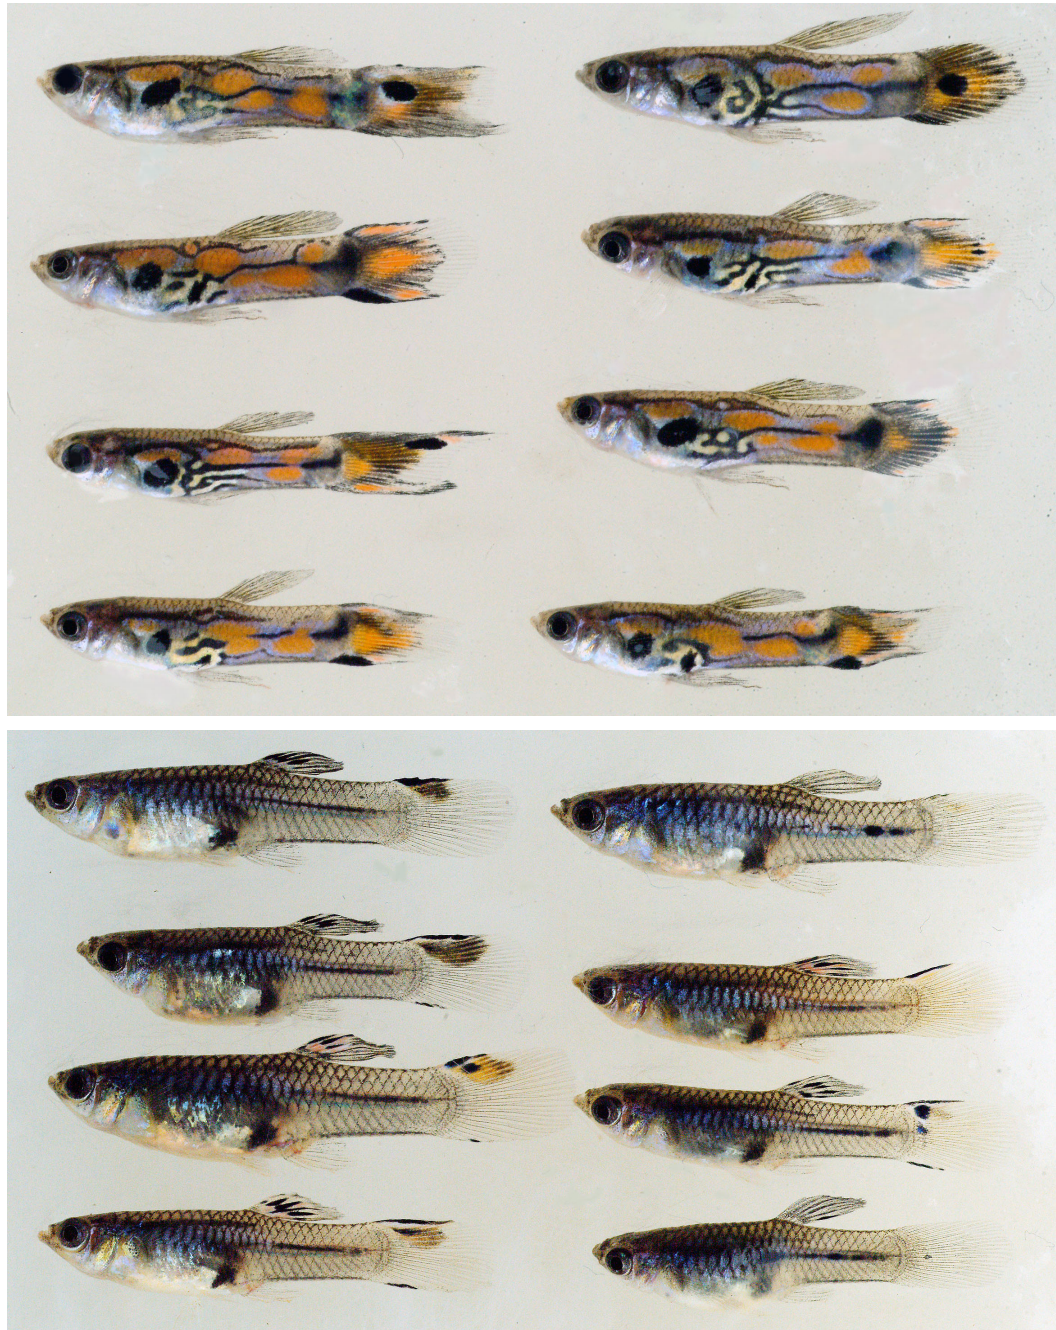

**Supplementary Figure S6:** Males (upper) and testosterone treated females (lower) of *P. reticulata*, strain IstW



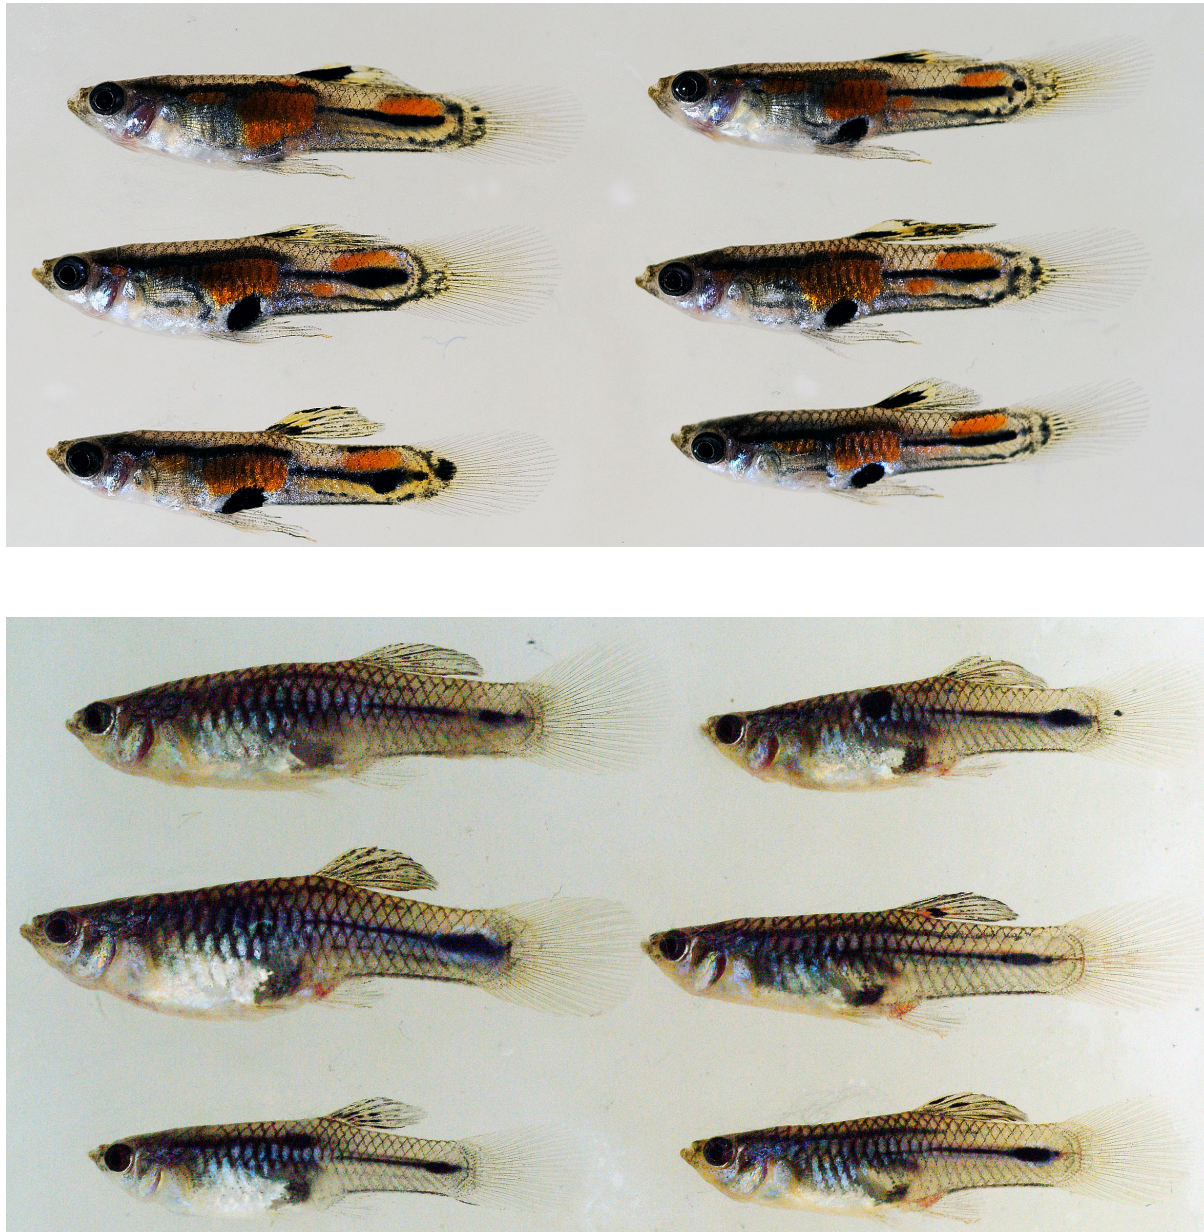

**Supplementary Figure S7:** Males (upper) and testosterone treated females (lower) of *P. reticulata*, strain ma-ze.



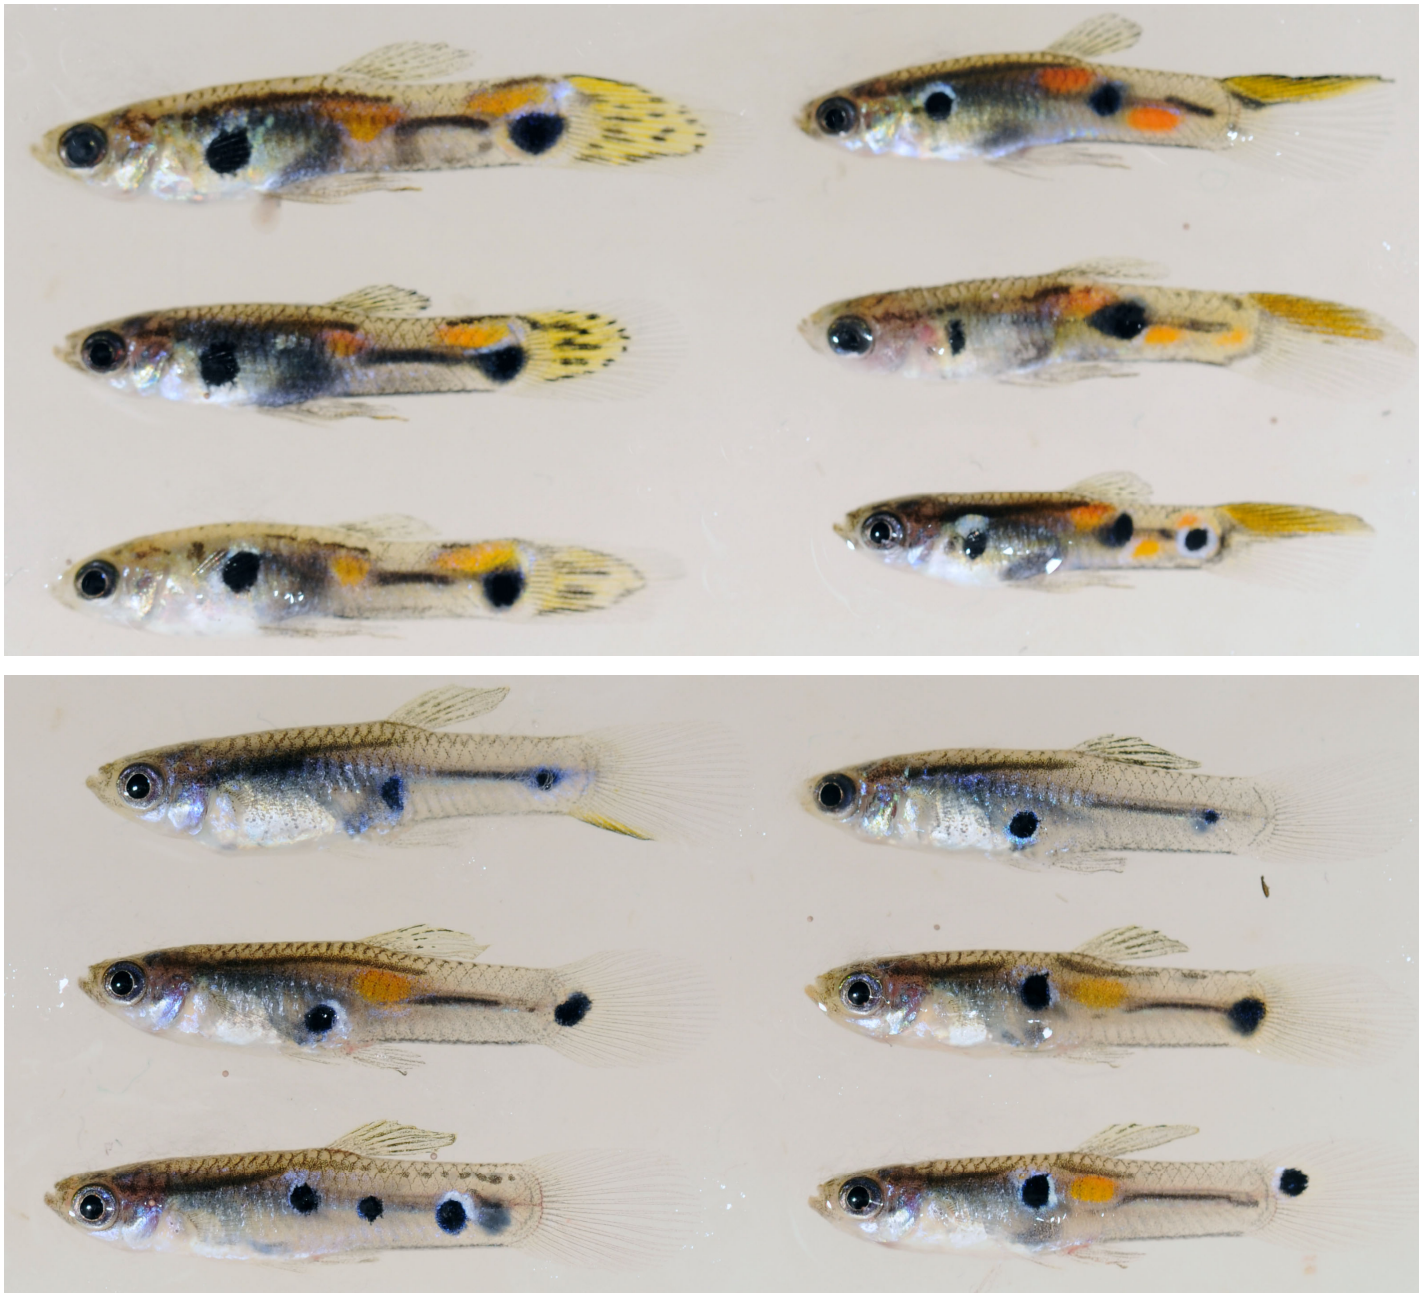

**Supplementary Figure S8:** Males (upper) and testosterone treated females (lower) of *P. reticulata*, strain HR.

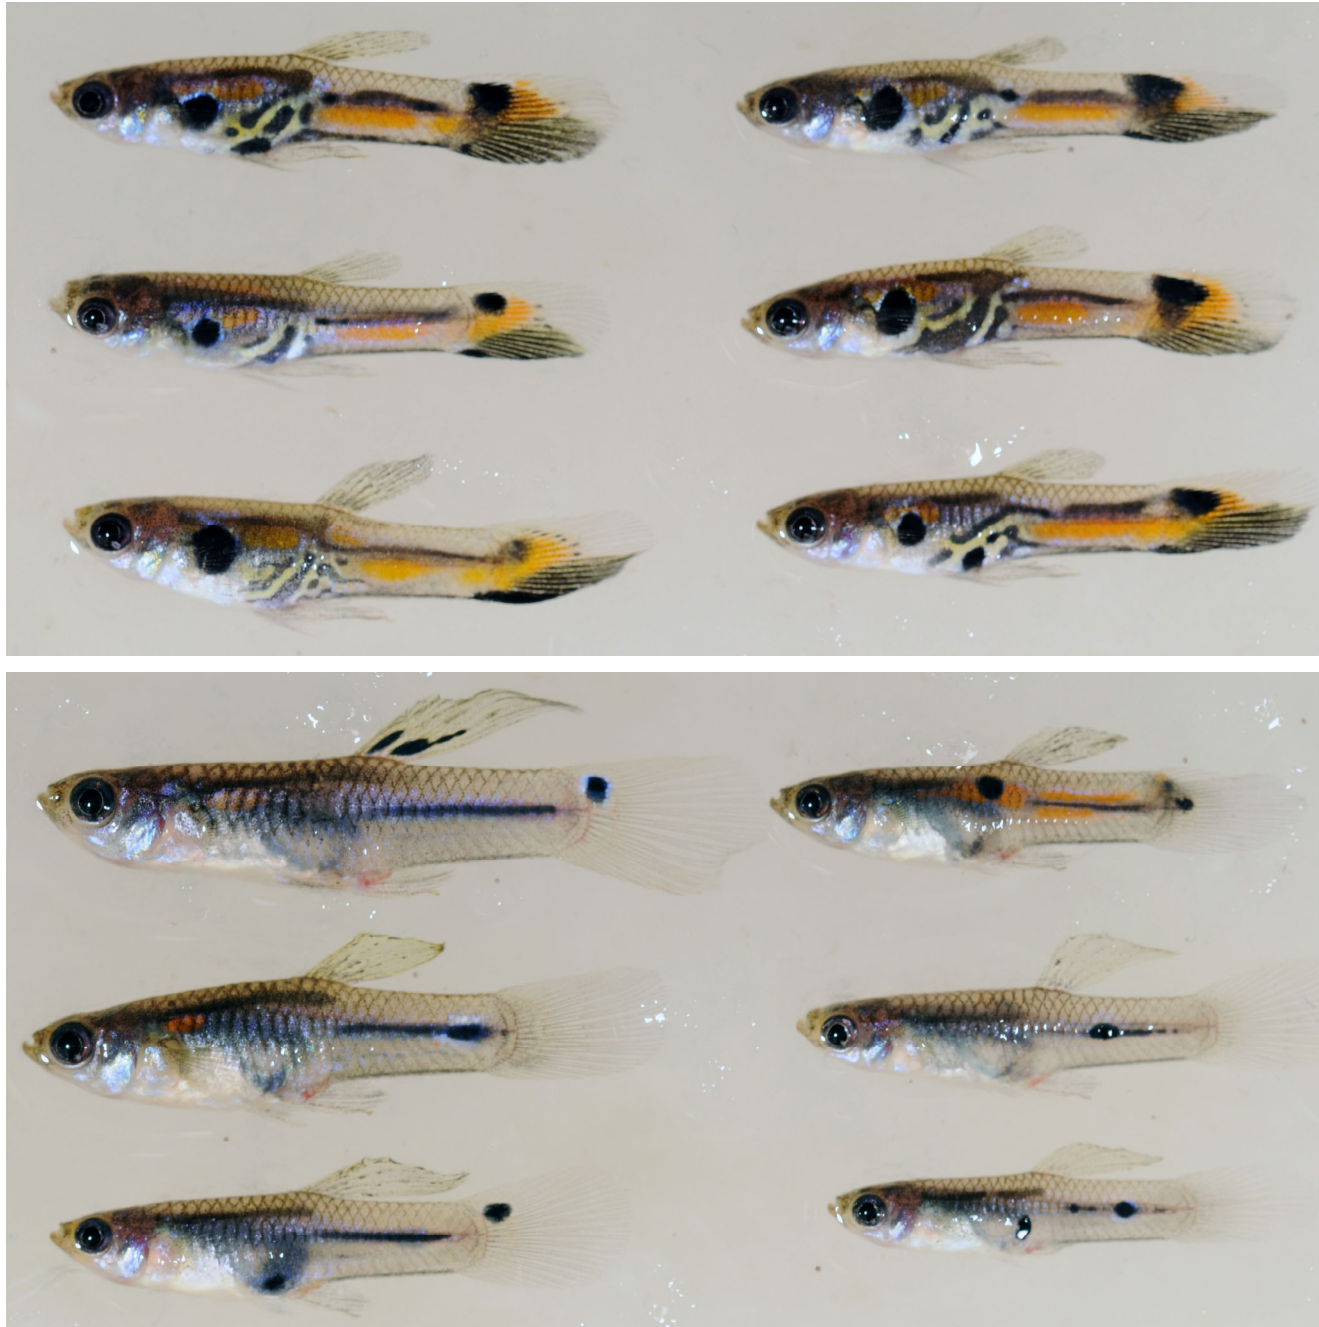

**Supplementary Figure S9:** Males (upper) and testosterone treated females (lower) of *P. reticulata*, strain HR.



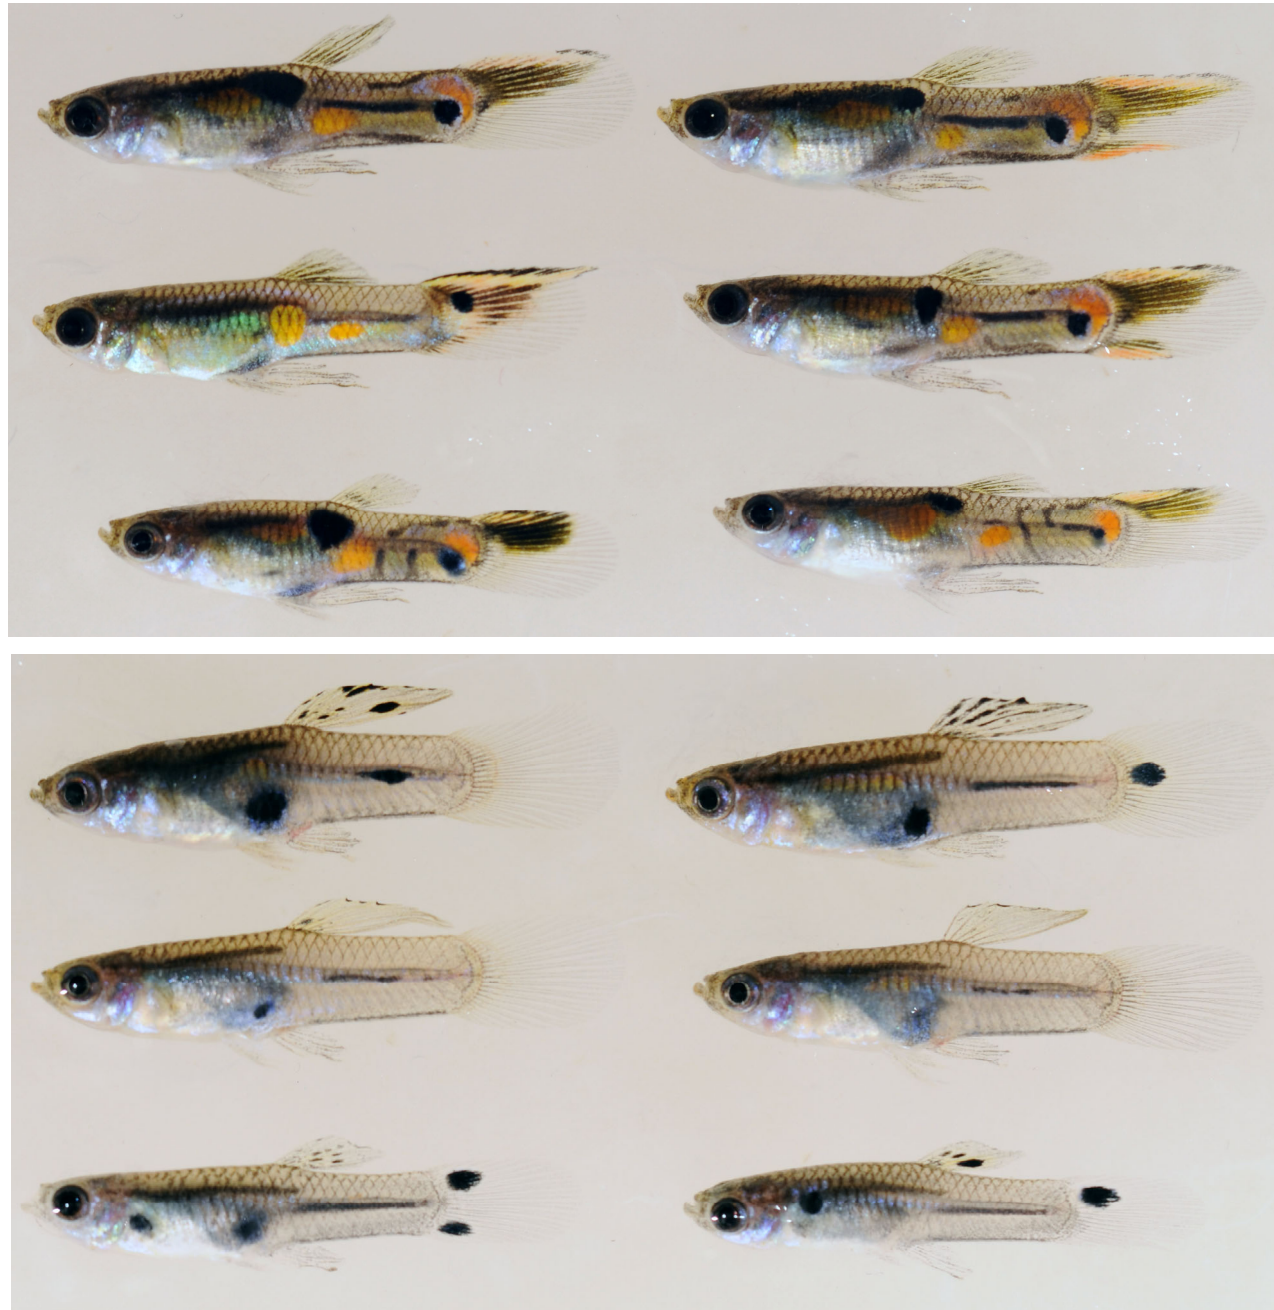

**Supplementary Figure S10:** Males (upper) and testosterone treated females (lower) of *P. obscura*, strain OR.

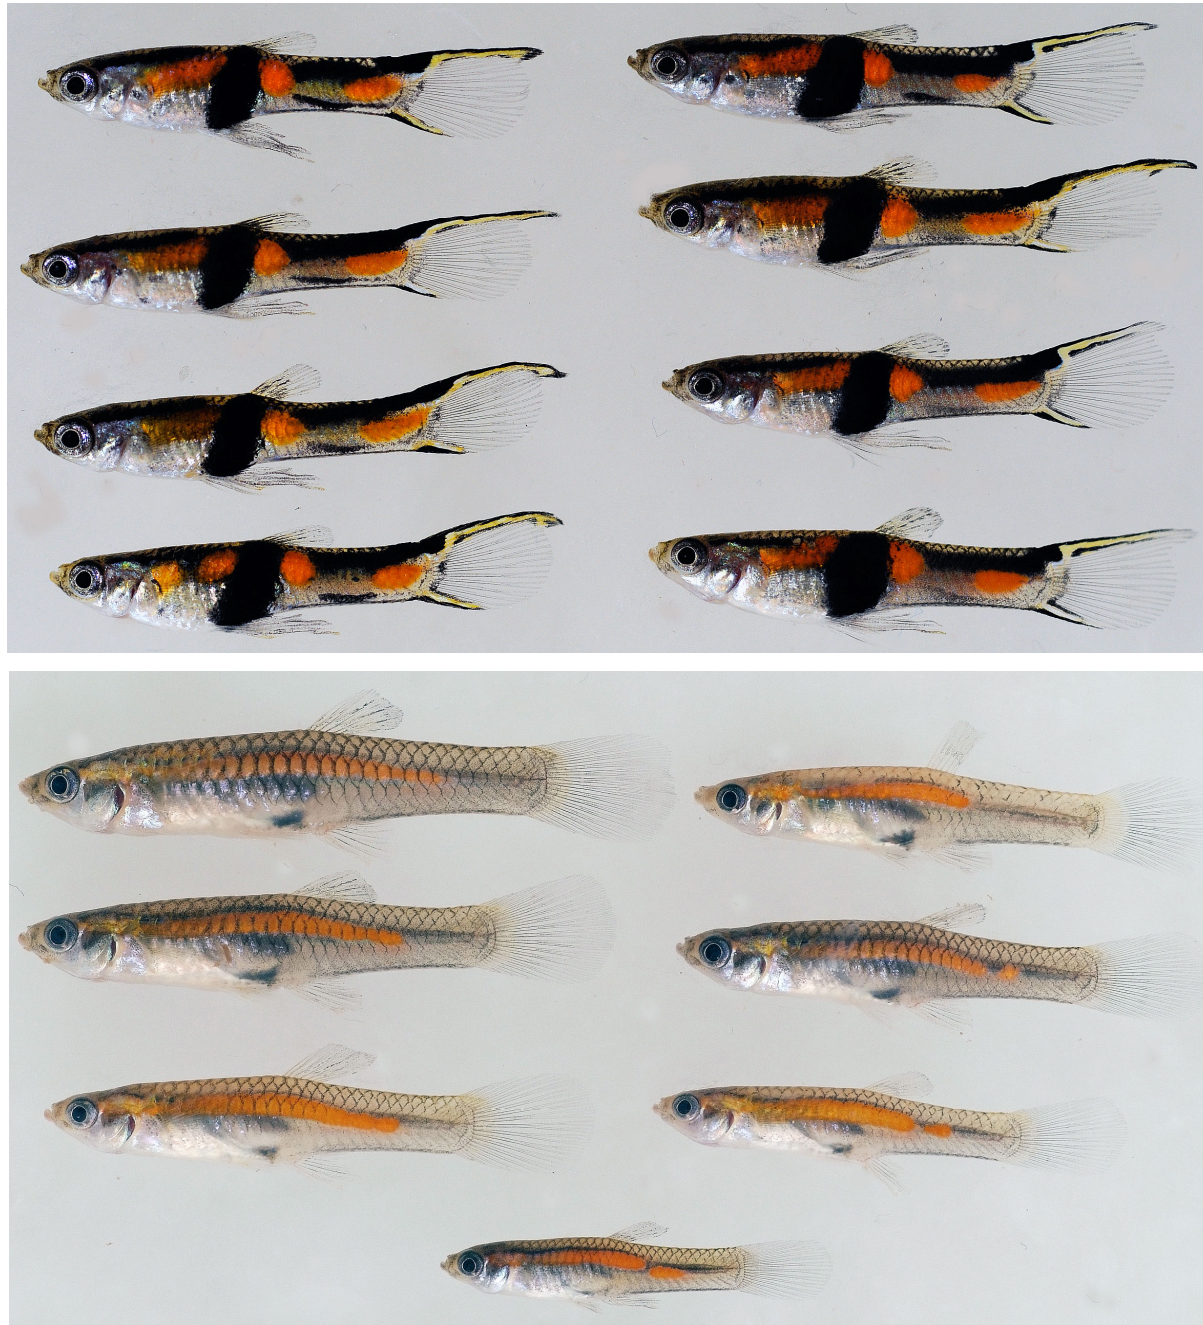

**Supplementary Figure S11:** Males (upper) and testosterone treated females (lower) of *P. wingei*, strain Ca.



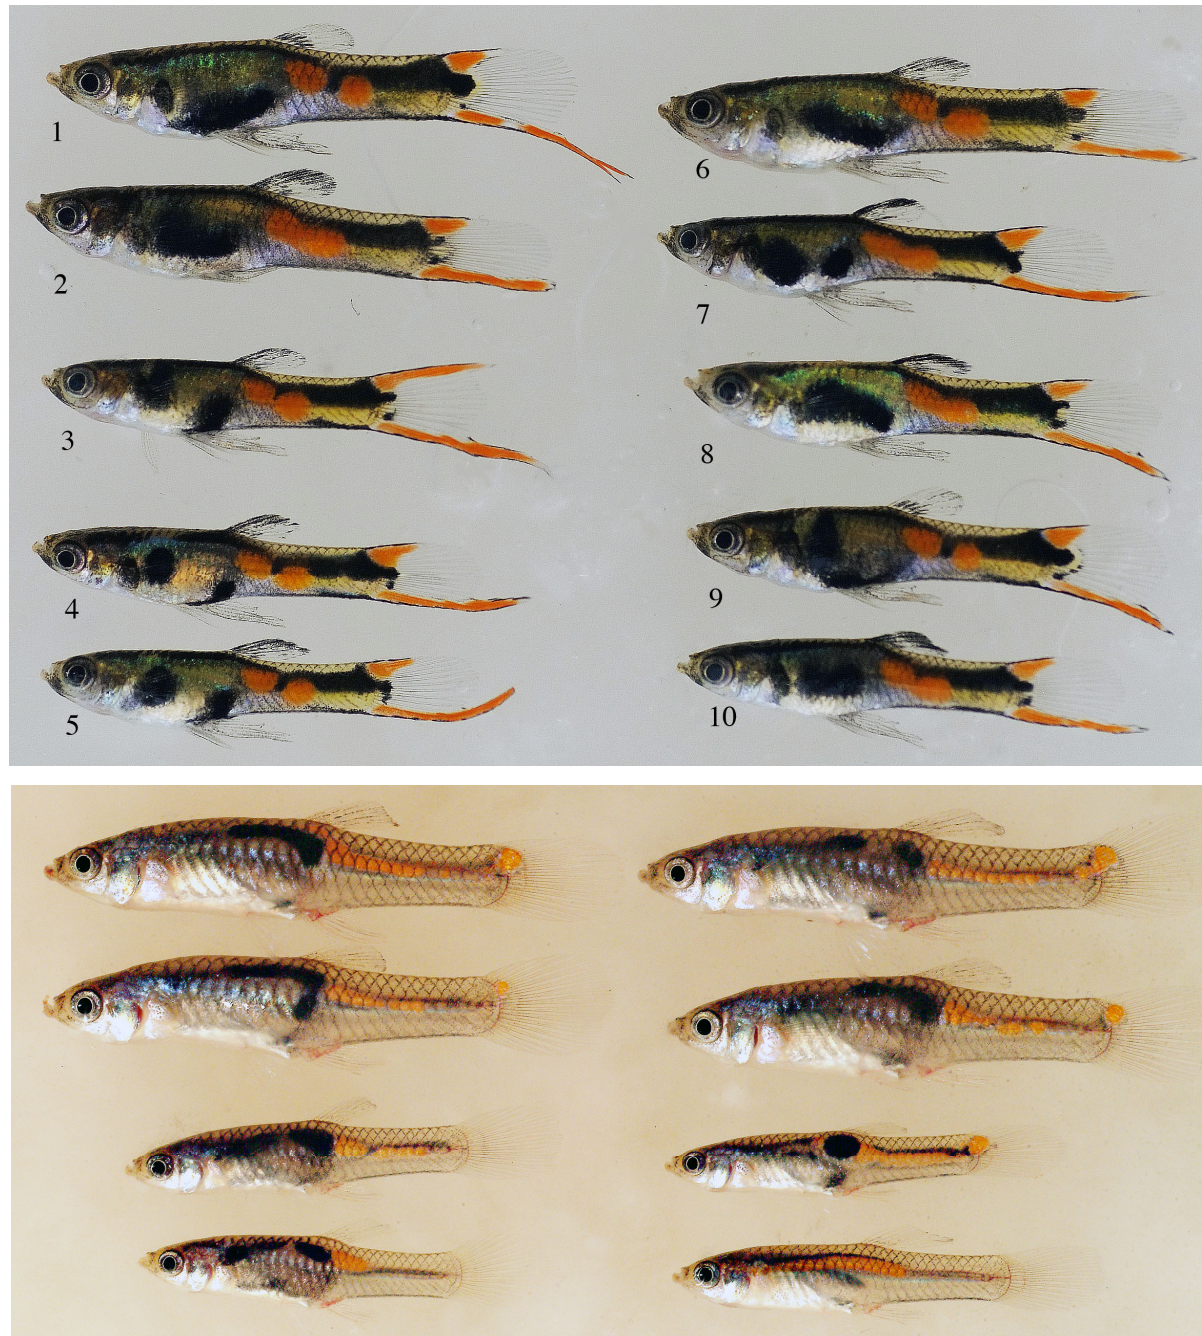

**Supplementary Figure S12:** Males (upper) and testosterone treated females (lower) of *P. wingei*, strain LP, laboratory line 3521



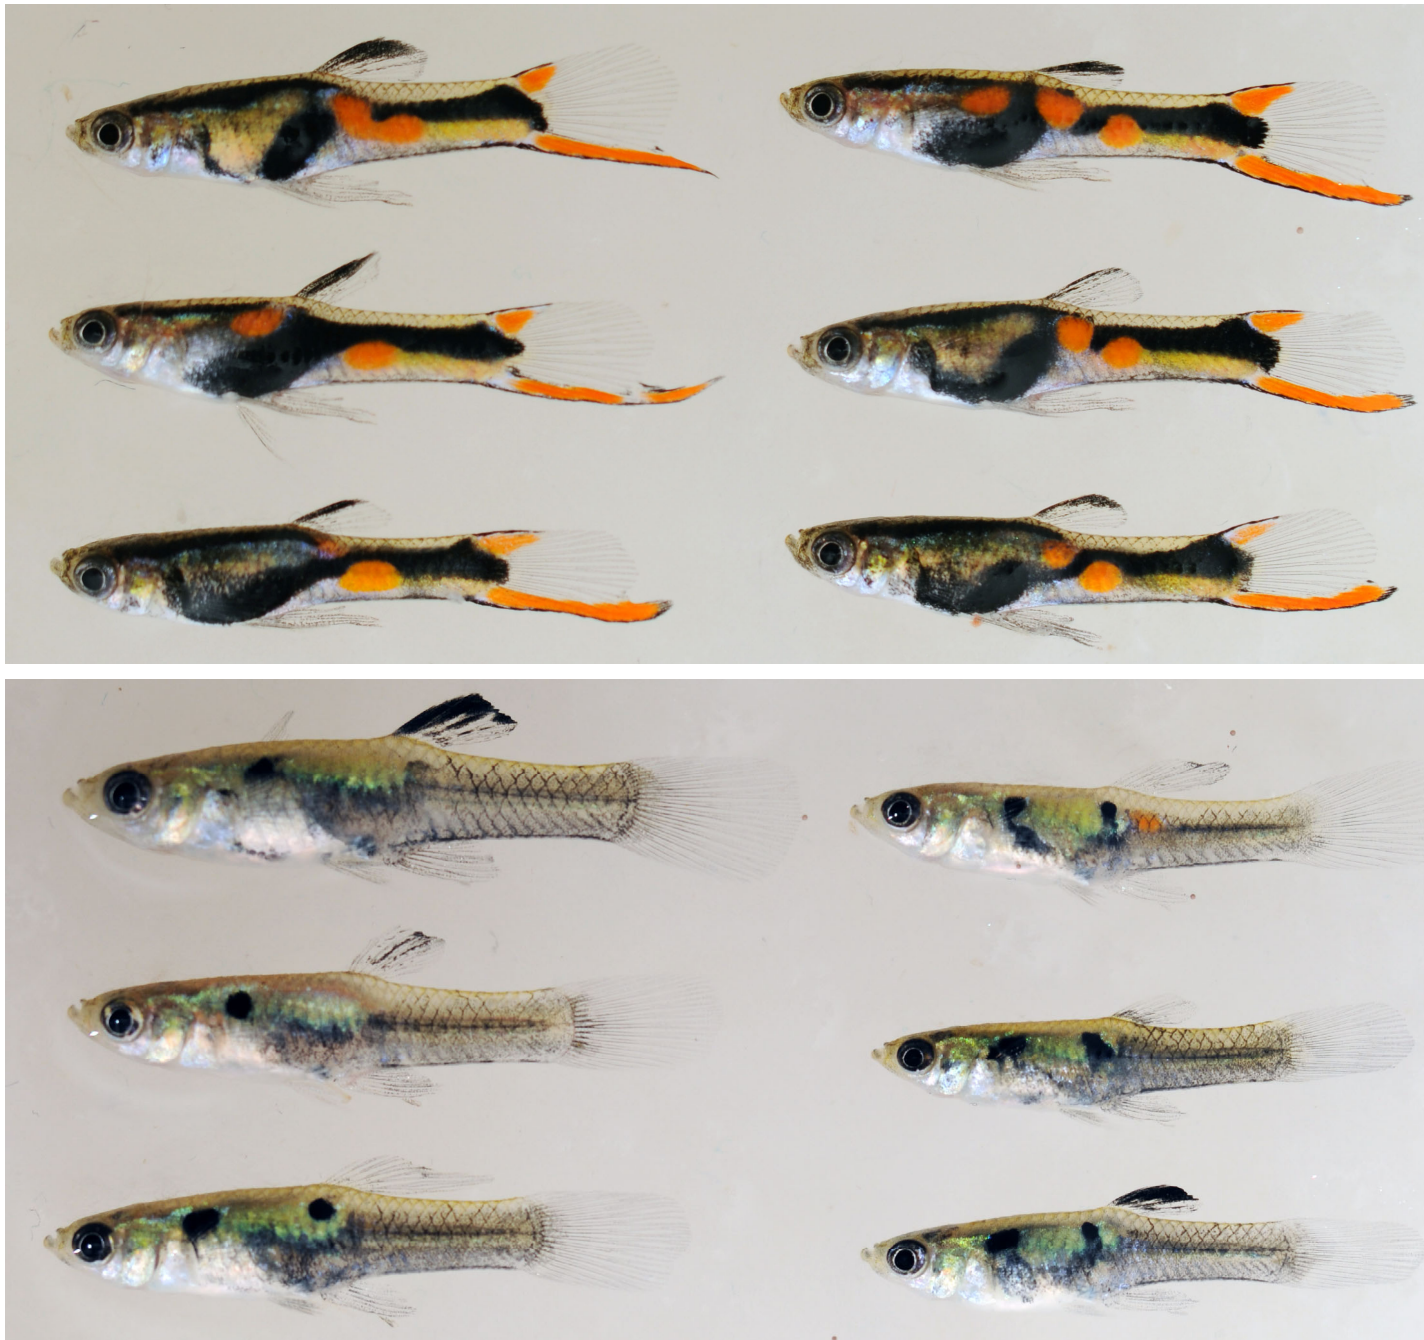

**Supplementary Figure S13:** Males (upper) and testosterone treated females (lower) of *P. wingei*, strain LP, laboratory line 3521b

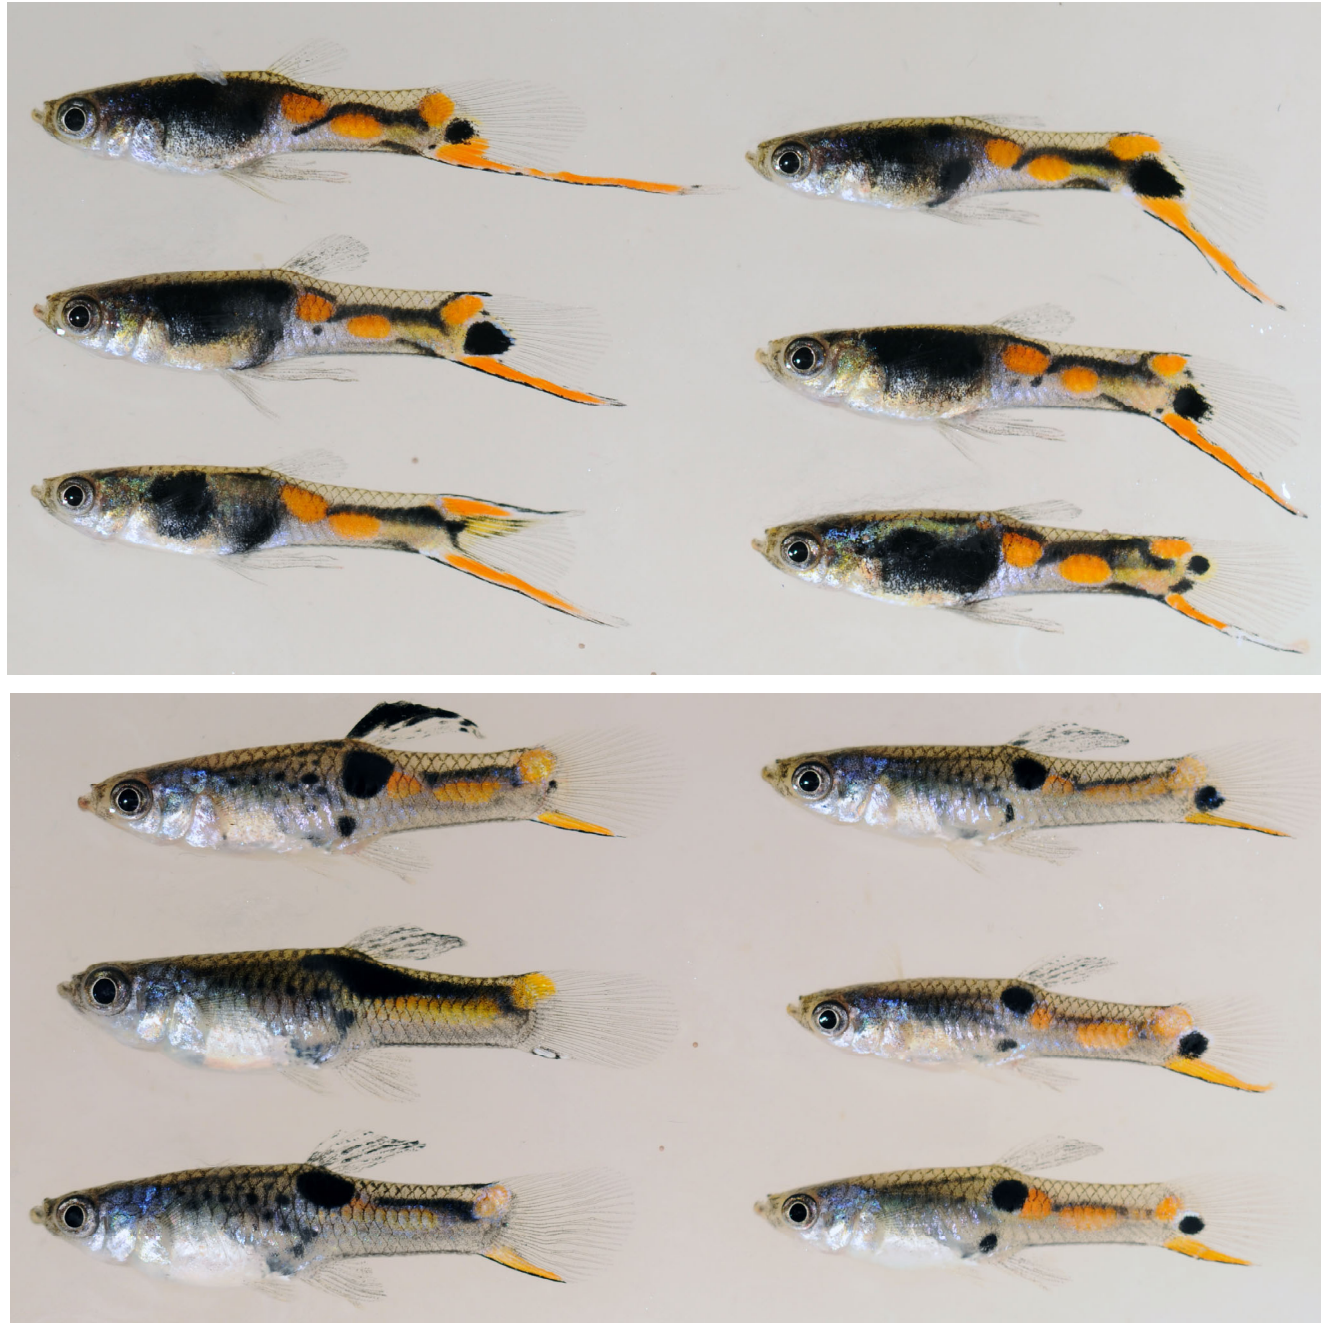

**Supplementary Figure S14:** Males (upper) and testosterone treated females (lower) of *P. wingei*, strain LP, laboratory line 5898



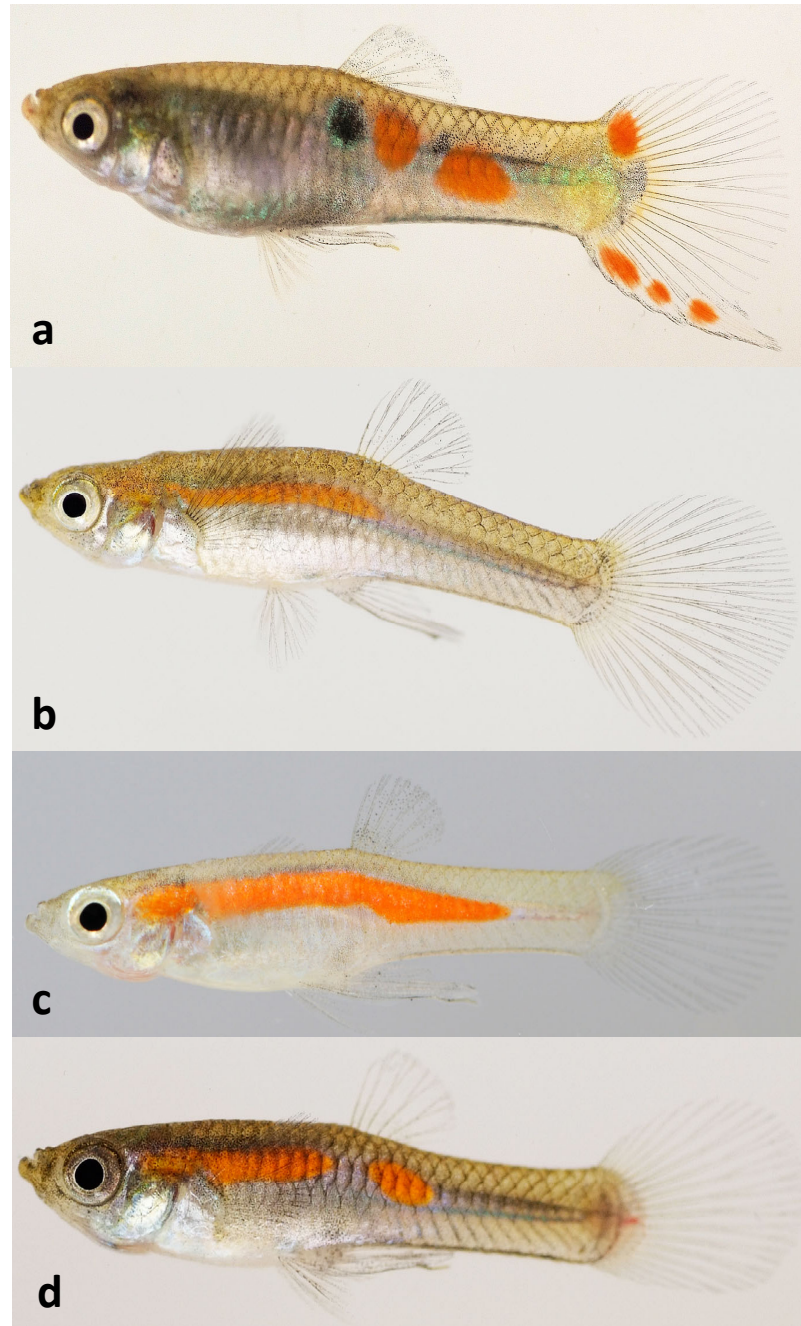

**Supplementary Figure S15:** XX males of *P. wingei*. (a) strain LP (b-d) strain Ca.

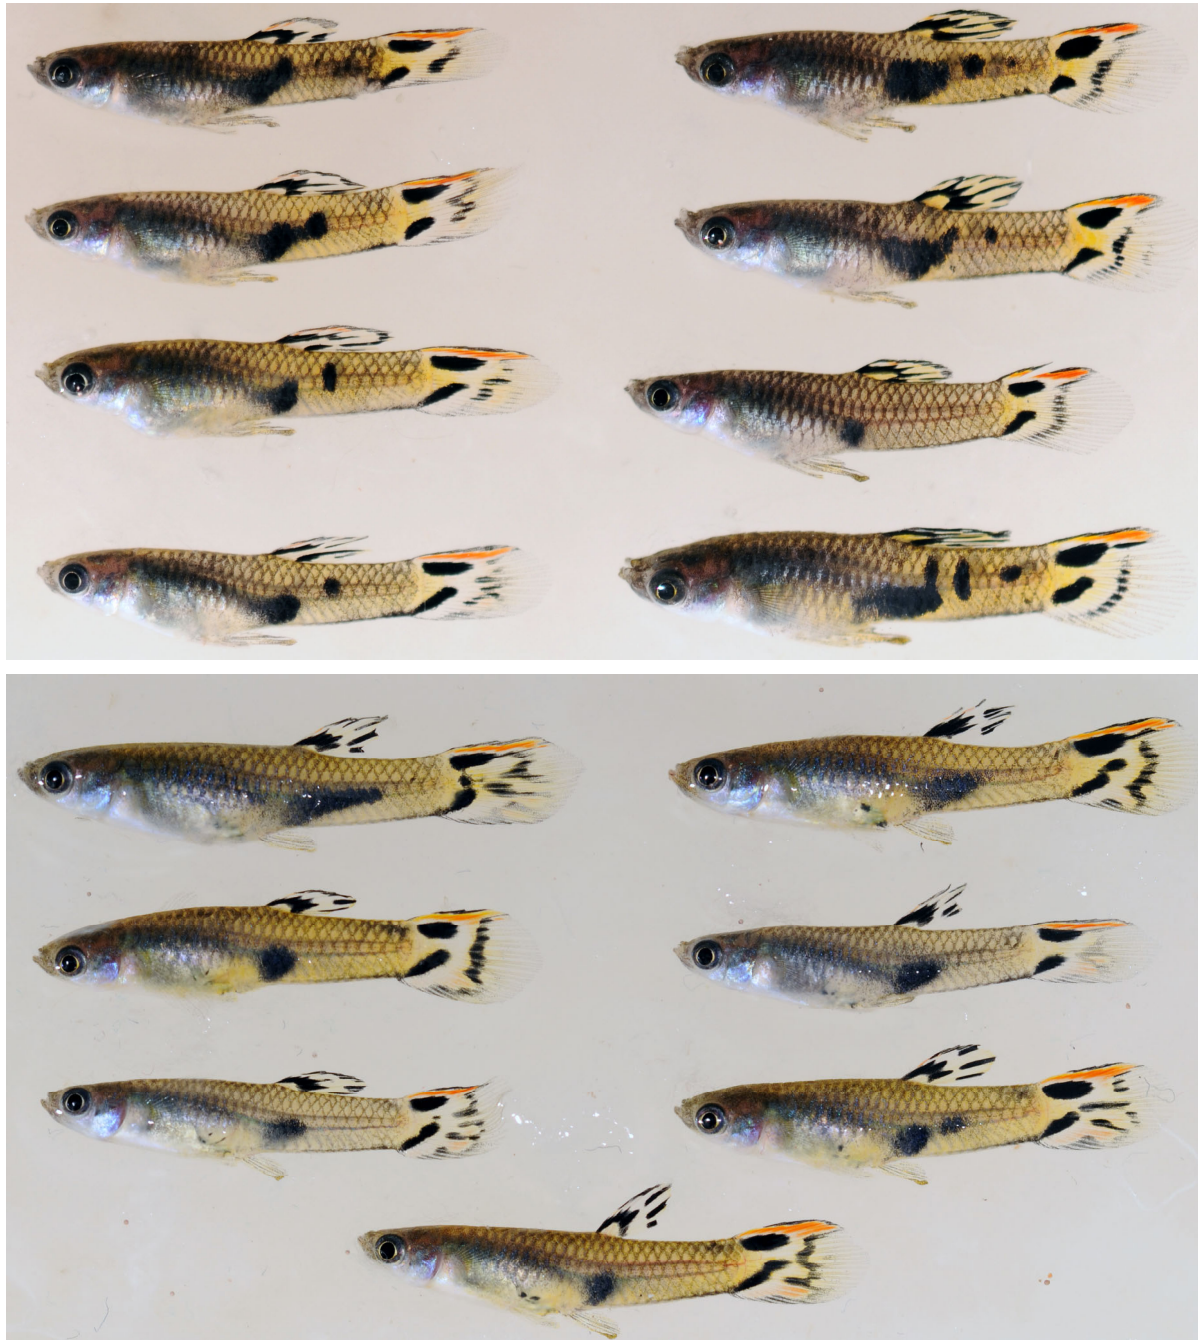

**Supplementary Figure S16:** Males (upper) and testosterone treated females (lower) of *M. picta*, strain TR.



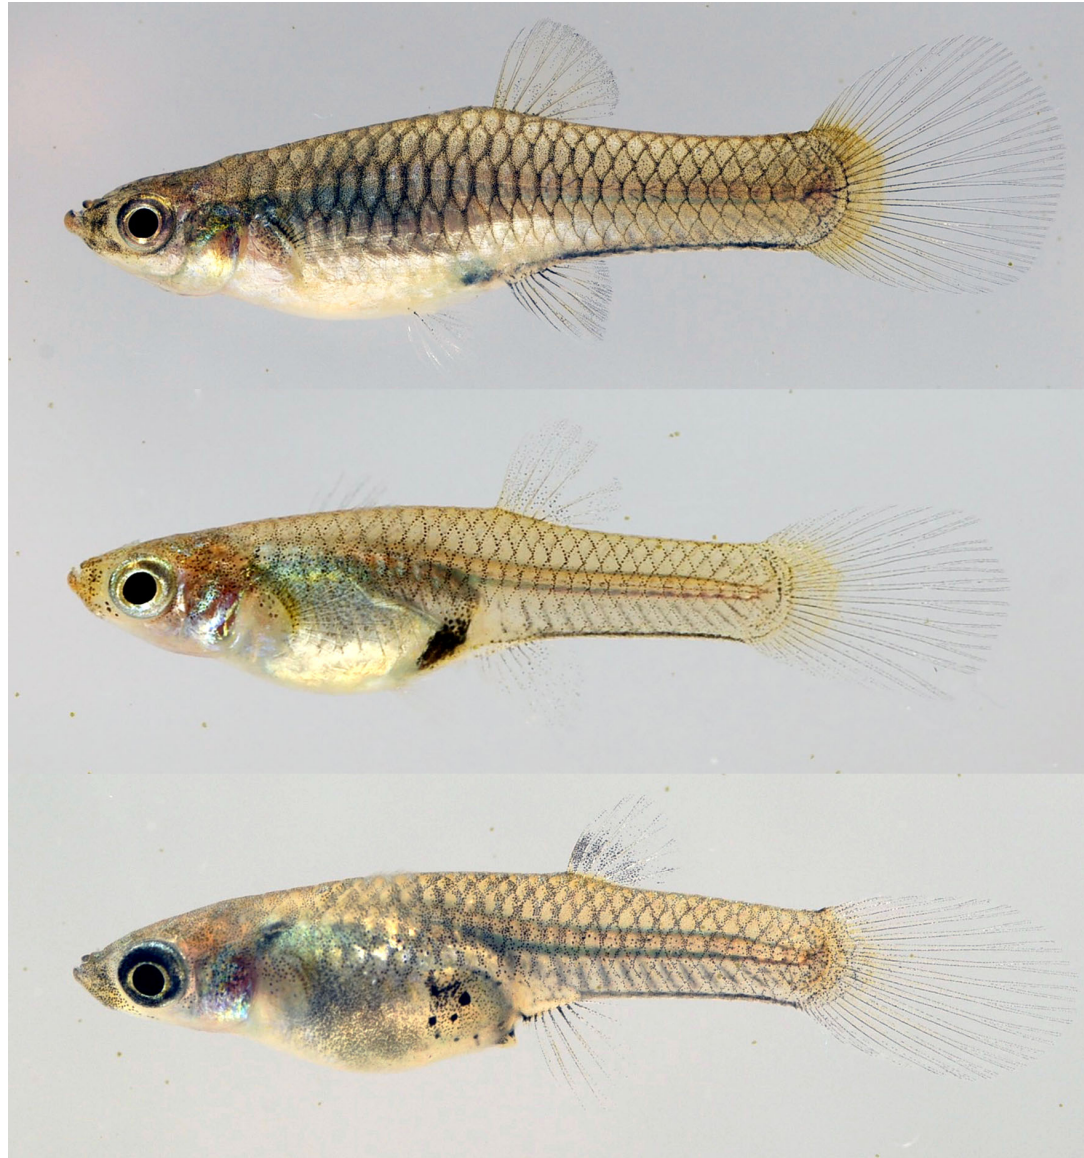

**Supplementary Figure S17:** Untreated females of *P. wingei* (upper), *P. reticulata* (middle), *M. picta* (lower). Untreated females of *P. obscura* are phenotypically undistinguishable from females of *P. reticulata*.
