# Supplementary material for: Evolution of the Degenerated Y-Chromosome of the Swamp Guppy, Micropoecilia picta
Source: MDPI journal article supplement (doi:10.3390/cells11071118), 2022-03-25
Supplement: s1 [file s1]

**Supplementary Table S1: Origin of fish strains**

| Strain name                 | Strain ID (WLC#)      | Geographical Origin                                    | Remarks                                                                                             |
|-----------------------------|-----------------------|--------------------------------------------------------|-----------------------------------------------------------------------------------------------------|
| <i>P. obscura</i> OR        | 3492                  | Oropuche River (N 10° 43.052'; W 61° 8.871')           | Cumaca Caves, Trinidad. Locus typicus of <i>P. obscura</i> , collected by S. Schories and M.Schartl |
| <i>P. obscura</i> RS        | 3507                  | Río Seco River                                         | below Río Seco waterfall, at Salybia River junction, Trinidad                                       |
| <i>P. wingei</i> Ca         | 3614                  | Campoma, between Laguna Buena Vista and Laguna Campoma | 3 km north of Cariaco, Venezuela. Locus typicus of <i>P. wingei</i> ; collected by F.N. Poeser      |
| <i>P. wingei</i> LP         | 3521<br>3521b<br>5898 | Laguna de los Patos (N 10° 25.043'; W 64° 12.065')     | West of Cumaná, Venezuela                                                                           |
| <i>P. reticulata</i> HR     | 3491                  | Hollis Reservoir (N 10° 39.760' W 61° 11.734')         | Entrance of Hollis Reservoir at Mt. Carmel Ave, Trinidad                                            |
| <i>P. reticulata</i> GR     | 5856                  | Lower Guanapo River                                    | Twin Bridge, North West Trinidad, Tübingen genome strain, collected by D. Reznick.                  |
| <i>P. reticulata</i> RR     | 5000                  | Rojas River (N 10° 04.332' W 61° 30.192') Trinidad     | Small ditch close to mouth into Quinam Bay, east of recreational park shore                         |
| <i>P. reticulata</i> ma-ze  | 6187                  | unkown                                                 | Laboratory strain “maculatus-zebrinus”, established by O. Winge                                     |
| <i>P. reticulata</i> pauper | 1307                  | unkown                                                 | Laboratory strain “Pauper”, established by O. Winge                                                 |
| <i>P. reticulata</i> IstW   | 1312                  | unknown                                                | Laboratory strain “Istambul wild”, established by K.Kosswig                                         |
| <i>M. picta</i> FG          | 4333                  | Lac du bois diable, Kourou; French Guyana              | collected 2009 by fish hobbyists                                                                    |
| <i>M. picta</i> TR          | 5001                  | San Fernandez,Trinidad (N 10° 14.706' W 61° 30.292')   | Brackish roadside ditch of the coastal highway                                                      |
